# Supplementary material
Source: Springer Nature journal article supplement (https://www.springermedizin.de/resource/supplementary/12888_2012_1296_MOESM1_ESM.pdf/9479800)
Supplement: MOESM1 [file 9479800]

## Identification

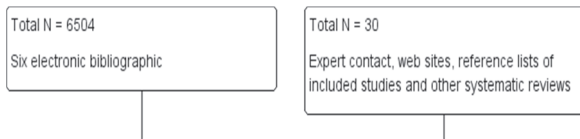

## Screening

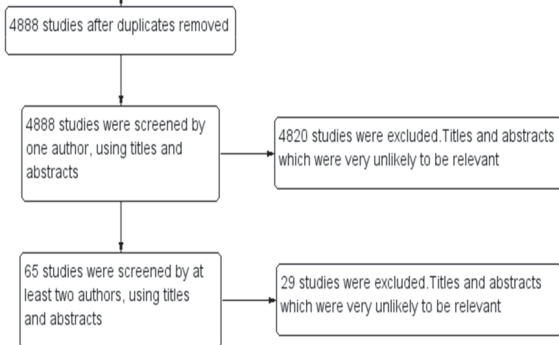

## Eligibility

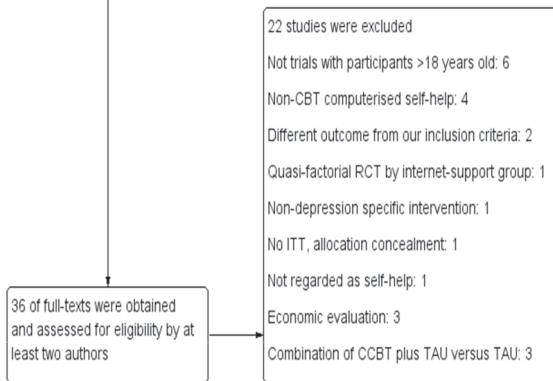

## Included

A Total of 14 studies (16 comparisons) met the selection criteria and were included
